# Supplementary figures and images for: Adhesion Improvement of Solvent-Free Pressure-Sensitive Adhesives by Semi-IPN Using Polyurethanes and Acrylic Polymers
Source: MDPI journal article supplement (doi:10.3390/polym14193963), 2022-09-22

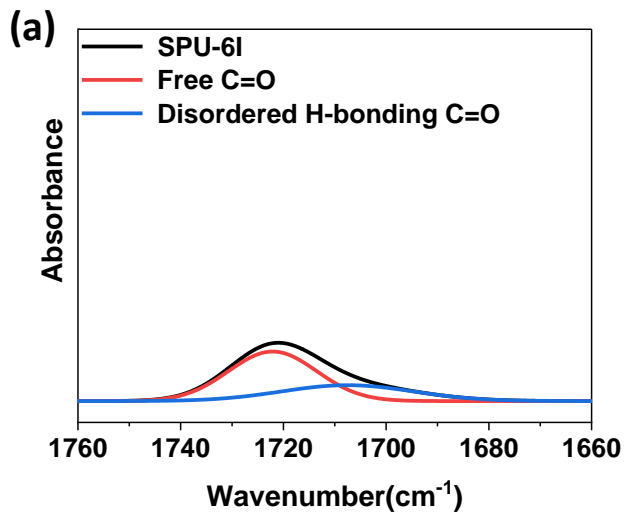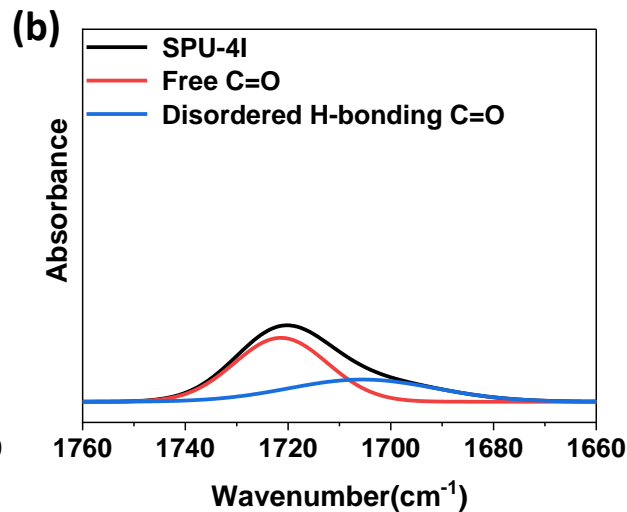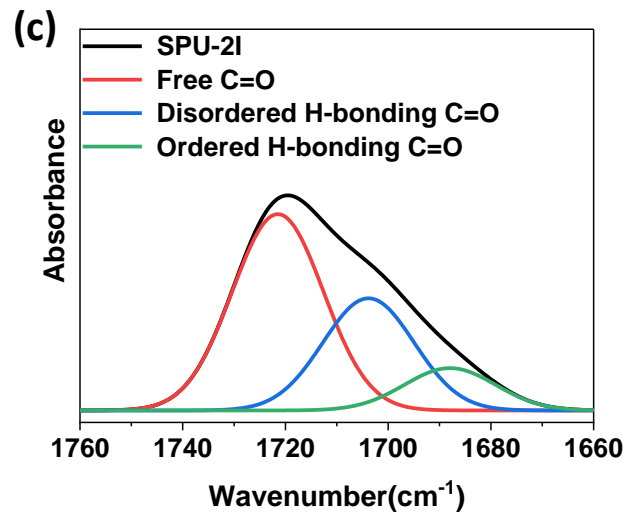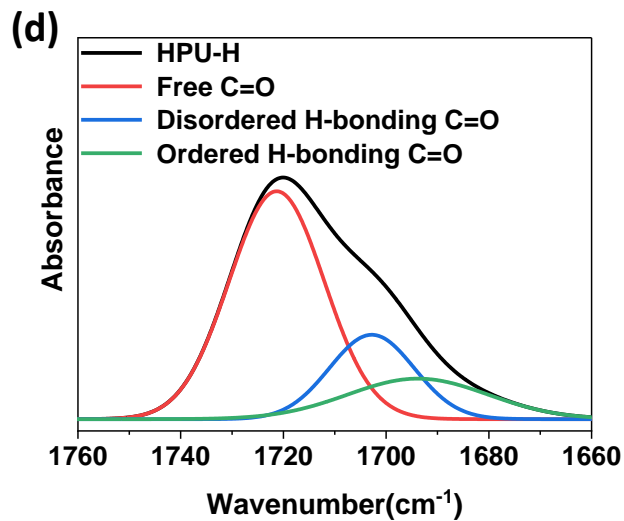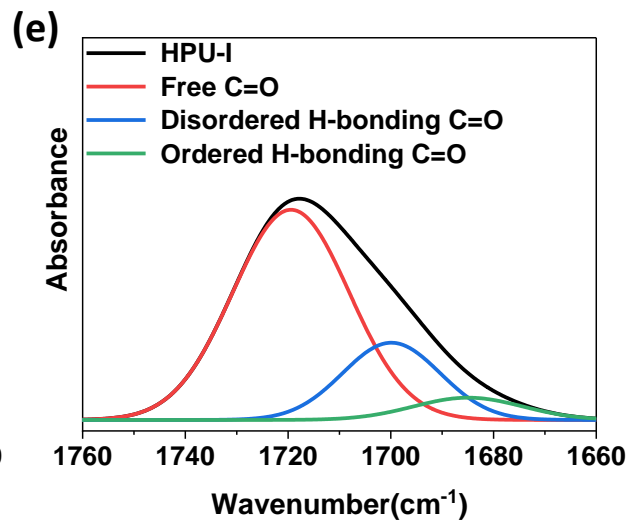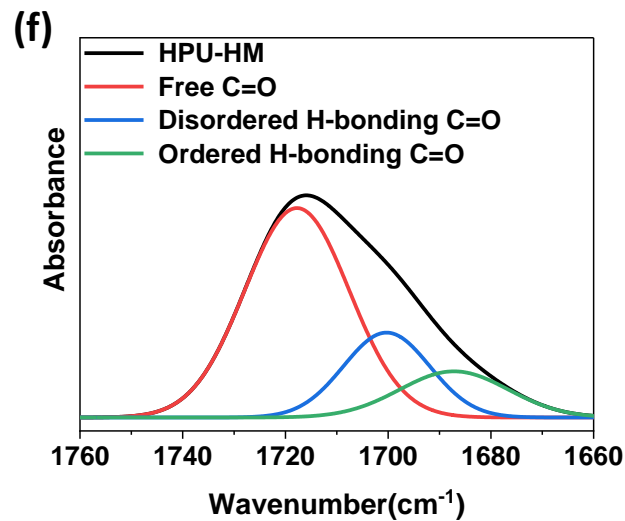

Supplement: s1 [file s1]

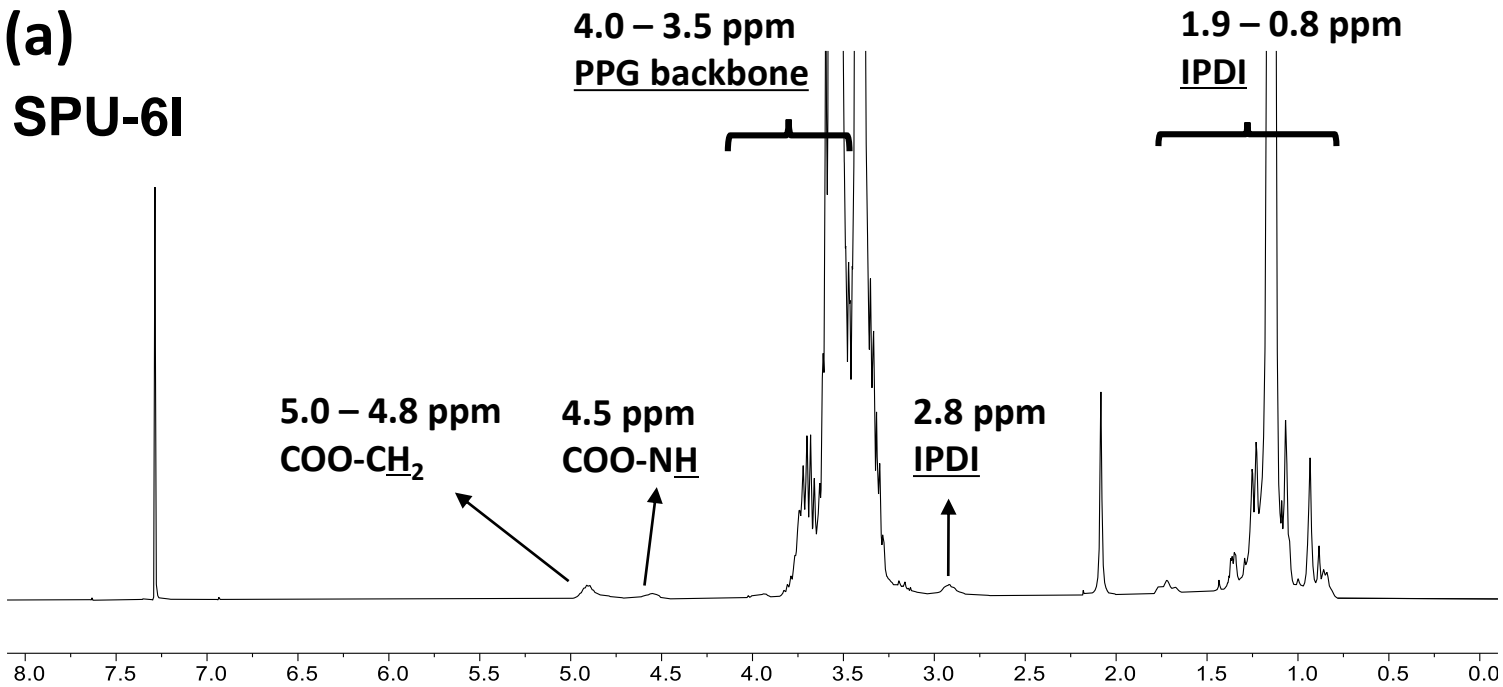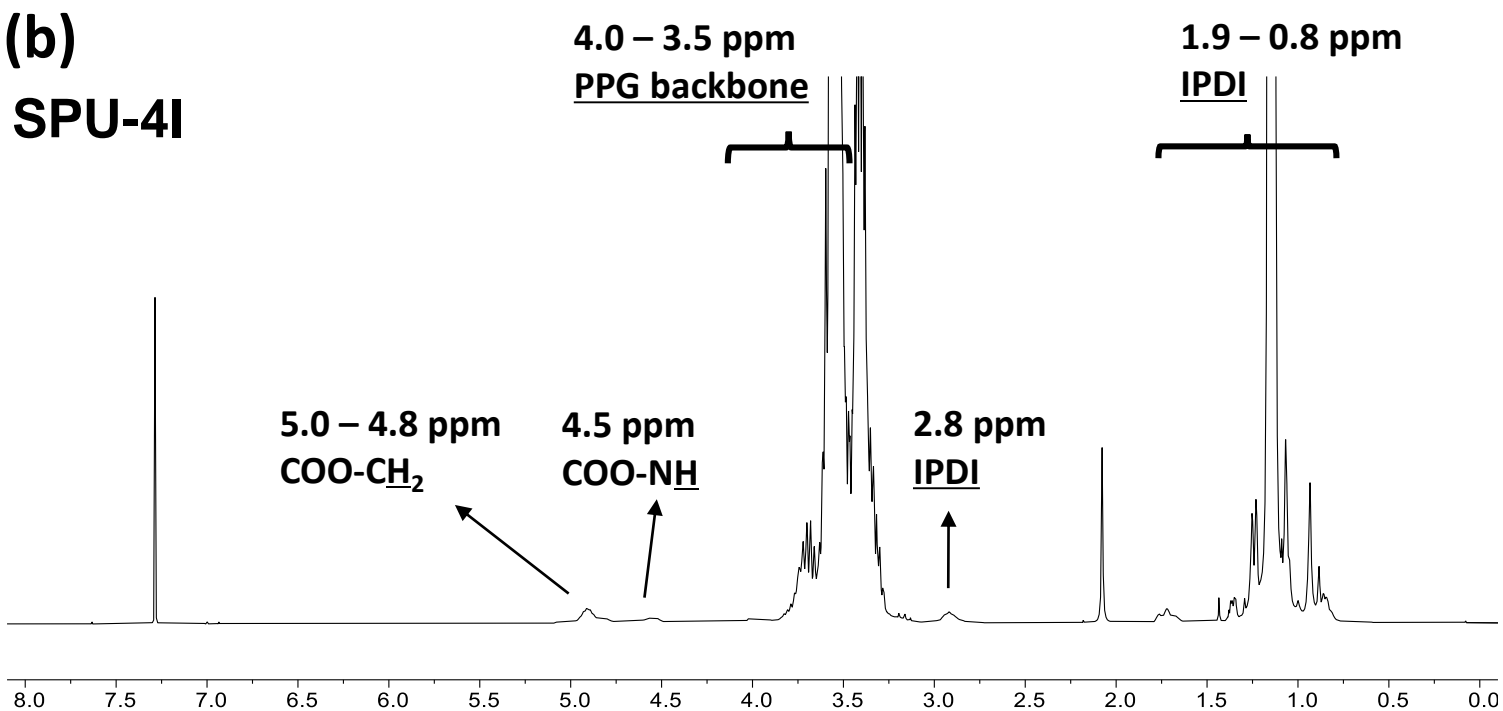

Supplement: s1 [file s1]
